# Supplementary material for: Design and synthesis of a solution-processed redox-active bis(formazanate) zinc complex for resistive switching applications
Source: Royal Society of Chemistry journal article supplement (doi:10.1039/d3dt02809g), 2023-01-01
Supplement: d3dt02809g1.pdf [file d3dt02809g1.pdf]

## Supporting Information

### Design and Synthesis of Solution-Processed Redox-Active

### Bis(Formazanate) Zinc Complex for Resistive Switching Applications

Sunita Birara,<sup>[a]</sup> Shalu Saini,<sup>[b]</sup> Moumita Majumder,\*<sup>[c][e]</sup> Prem Lama,<sup>[d]</sup> Shree Prakash Tiwari,\*<sup>[b]</sup>

Ramesh K. Metre\*<sup>[a]</sup>

*[a] Department of Chemistry, Indian Institute of Technology Jodhpur, Rajasthan- 342030, India*

*[b] Department of Electrical Engineering, Indian Institute of Technology Jodhpur, Rajasthan-  
342030, India*

*[c] Department of Metallurgical and Materials Engineering, Indian Institute of Technology Jodhpur,  
Rajasthan- 342030, India*

*[d] CSIR-Indian Institute of Petroleum, Haridwar Road, Mokhampur, Dehradun- 248005, India*

*[e] Current Affiliation: Department of Chemistry, School of Science and Environmental Studies, Dr.*

*Vishwanath Karad MIT World Peace University, Pune- 411038, Maharashtra, India*

CORRESPONDING AUTHOR FOOTNOTE: \* To whom correspondence should be addressed. E-mail: [rkmetre@iitj.ac.in](mailto:rkmetre@iitj.ac.in) Phone (Office): (+91) 291-280-1309; [sptiwari@iitj.ac.in](mailto:sptiwari@iitj.ac.in)

Phone (Office): +91 291 280 1356; [moumita83iitd@gmail.com](mailto:moumita83iitd@gmail.com)

## Contents

|                                                                                                                                         |        |
|-----------------------------------------------------------------------------------------------------------------------------------------|--------|
| 1. Crystal data and structure refinement for Complex <b>1</b> .....                                                                     | S3.    |
| 2. IR Spectra of Ligand, LH and Complex <b>1</b> .....                                                                                  | S4.    |
| 3. Thermogravimetric analysis of Complex <b>1</b> .....                                                                                 | S5.    |
| 4. <sup>1</sup> H and <sup>13</sup> C NMR of Ligand, LH.....                                                                            | S5-S6. |
| 5. <sup>1</sup> H and <sup>13</sup> C NMR of Complex <b>1</b> .....                                                                     | S6-S7. |
| 6. ESI-MS of Ligand and Complex <b>1</b> .....                                                                                          | S7.    |
| 7. Elemental analysis of Ligand, LH and Complex <b>1</b> .....                                                                          | S8.    |
| 8. DFT optimized structure of complex <b>1</b> .....                                                                                    | S9.    |
| 9. Natural Population Analysis charges.....                                                                                             | S9.    |
| 10. Second order perturbation energy E2 (kcal/mol), off-diagonal Fock matrix elements<br>F(i,j) and acceptor – donor energy values..... | S10.   |
| 11. Molecular orbital energy levels Band gap (E <sub>g</sub> ) calculated from UV-visible<br>spectrum.....                              | S11.   |
| 12. TD-DFT computed electronic transition energy, oscillator strength, and transition<br>characters.....                                | S12.   |

**Table S1. Crystal data and structure refinement for Complex 1(CCDC 2286211).**

|                                                   |                                                                                   |
|---------------------------------------------------|-----------------------------------------------------------------------------------|
| <b>Empirical formula</b>                          | C <sub>49</sub> H <sub>46</sub> Cl <sub>2</sub> N <sub>18</sub> O <sub>5</sub> Zn |
| <b>Formula weight</b>                             | 1103.31                                                                           |
| <b>Temperature/K</b>                              | 100.15                                                                            |
| <b>Crystal system</b>                             | Triclinic                                                                         |
| <b>Space group</b>                                | P-1                                                                               |
| <b>a (Å)</b>                                      | 14.417(4)                                                                         |
| <b>b (Å)</b>                                      | 14.593(4)                                                                         |
| <b>c (Å)</b>                                      | 15.448(4)                                                                         |
| <b>α (°)</b>                                      | 109.695(7)                                                                        |
| <b>β (°)</b>                                      | 116.709(7)                                                                        |
| <b>γ (°)</b>                                      | 96.843(7)                                                                         |
| <b>Volume (Å<sup>3</sup>)</b>                     | 2588.0(13)                                                                        |
| <b>Z</b>                                          | 2                                                                                 |
| <b>ρ<sub>calc</sub>.cm<sup>-3</sup></b>           | 1.416                                                                             |
| <b>μ, mm<sup>-1</sup></b>                         | 0.643                                                                             |
| <b>F(000)</b>                                     | 1140.0                                                                            |
| <b>Crystal size (mm<sup>3</sup>)</b>              | 0.35 × 0.32 × 0.26                                                                |
| <b>Radiation</b>                                  | MoK <sub>α</sub> (λ = 0.71073)                                                    |
| <b>2θ range for data collection (°)</b>           | 5.602 to 49.996                                                                   |
| <b>Index ranges</b>                               | -17 ≤ h ≤ 17, -17 ≤ k ≤ 17, -18 ≤ l ≤ 18                                          |
| <b>Reflections collected</b>                      | 18273                                                                             |
| <b>Independent reflections</b>                    | 8976 [R <sub>int</sub> = 0.0409, R <sub>sigma</sub> = 0.0628]                     |
| <b>Data/restraints/parameters</b>                 | 8976/6/749                                                                        |
| <b>Goodness-of-fit on F<sup>2</sup></b>           | 1.048                                                                             |
| <b>Final R indexes [I ≥ 2σ (I)]</b>               | R <sub>1</sub> = 0.0544, wR <sub>2</sub> = 0.1245                                 |
| <b>Final R indexes [all data]</b>                 | R <sub>1</sub> = 0.0749, wR <sub>2</sub> = 0.1361                                 |
| <b>Largest diff. peak/hole (e Å<sup>-3</sup>)</b> | 0.81/-0.55                                                                        |

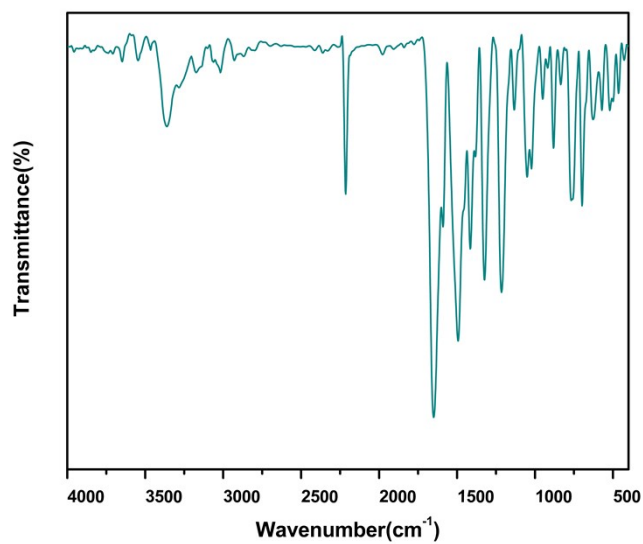

**Figure S1.** FT-IR spectrum of Ligand (LH).

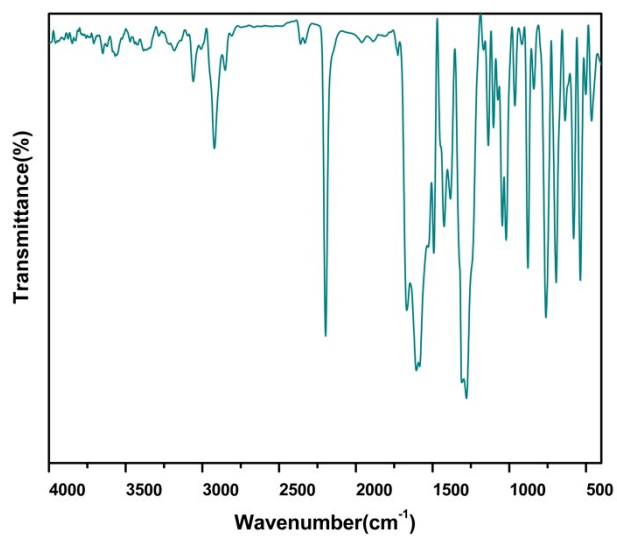

**Figure S2.** FT-IR Spectrum of complex **1**, [Zn<sup>II</sup>L<sub>2</sub>]

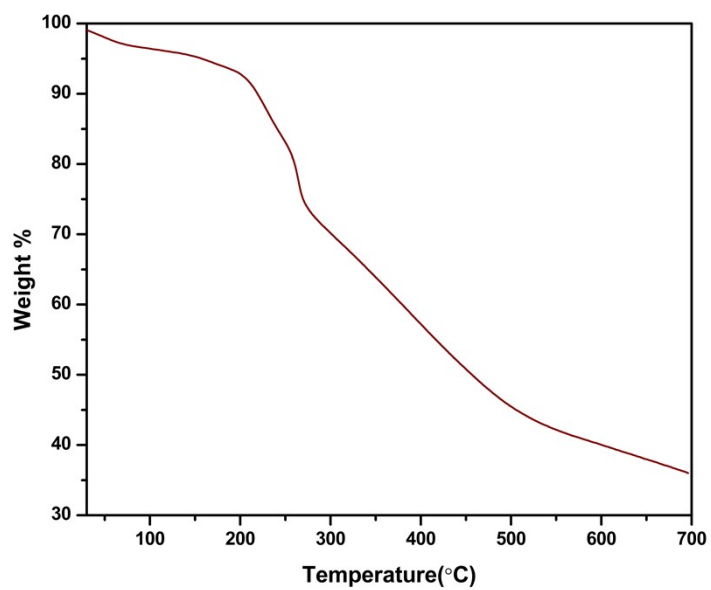

**Figure S3.** Thermogravimetric analysis of Complex 1.

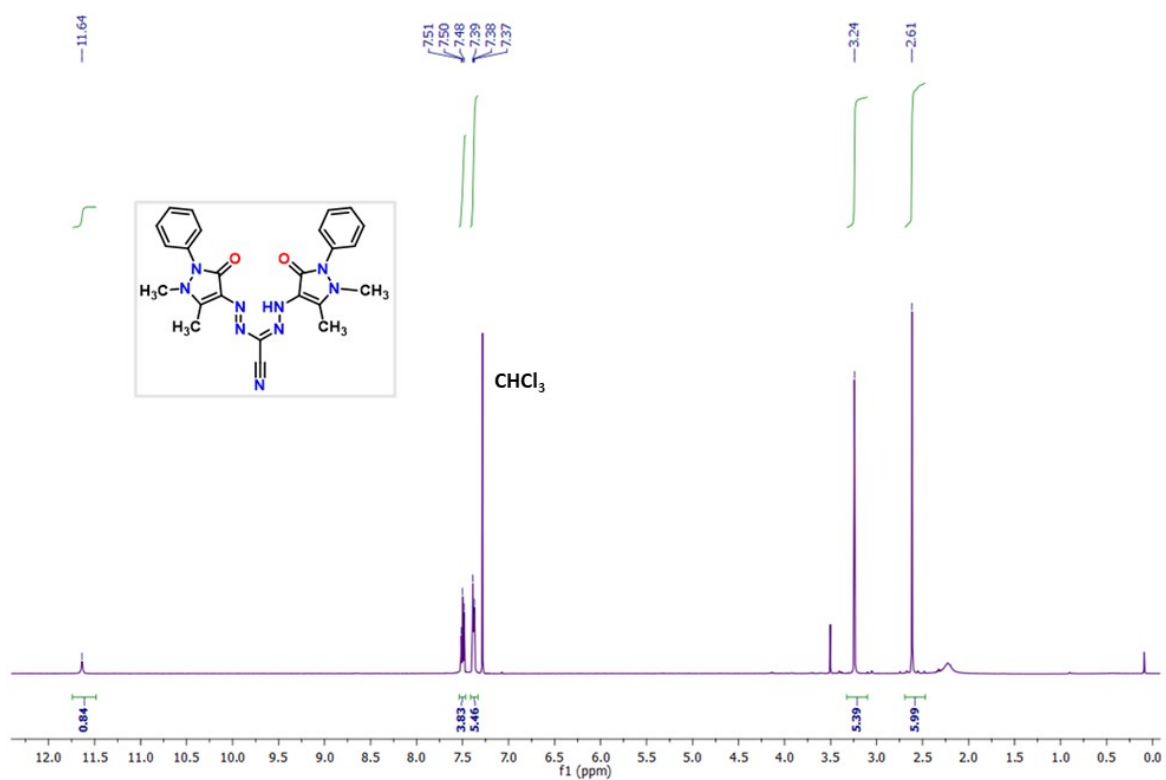

**Figure S4.** <sup>1</sup>H NMR (500 MHz, CDCl<sub>3</sub>) of Ligand (LH).

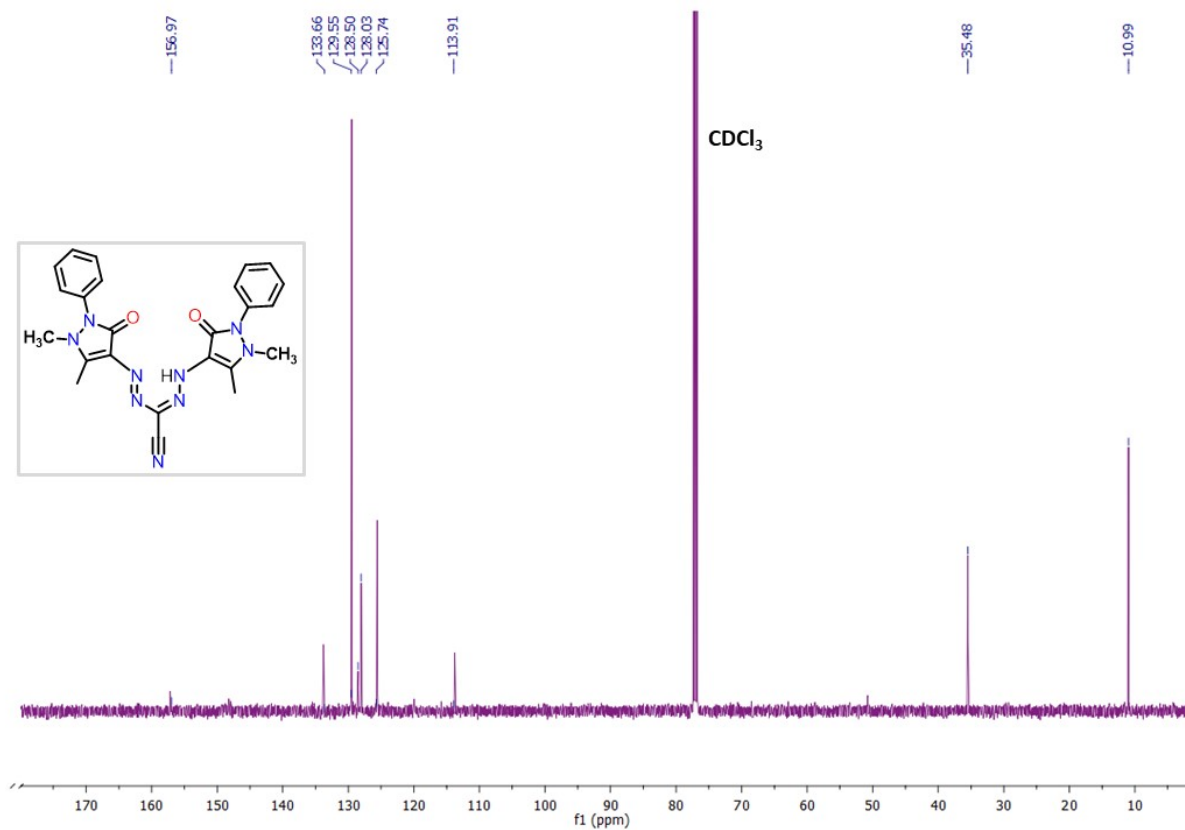

**Figure S5.**  $^{13}\text{C}\{^1\text{H}\}$  NMR (126 MHz,  $\text{CDCl}_3$ ) of Ligand (LH).

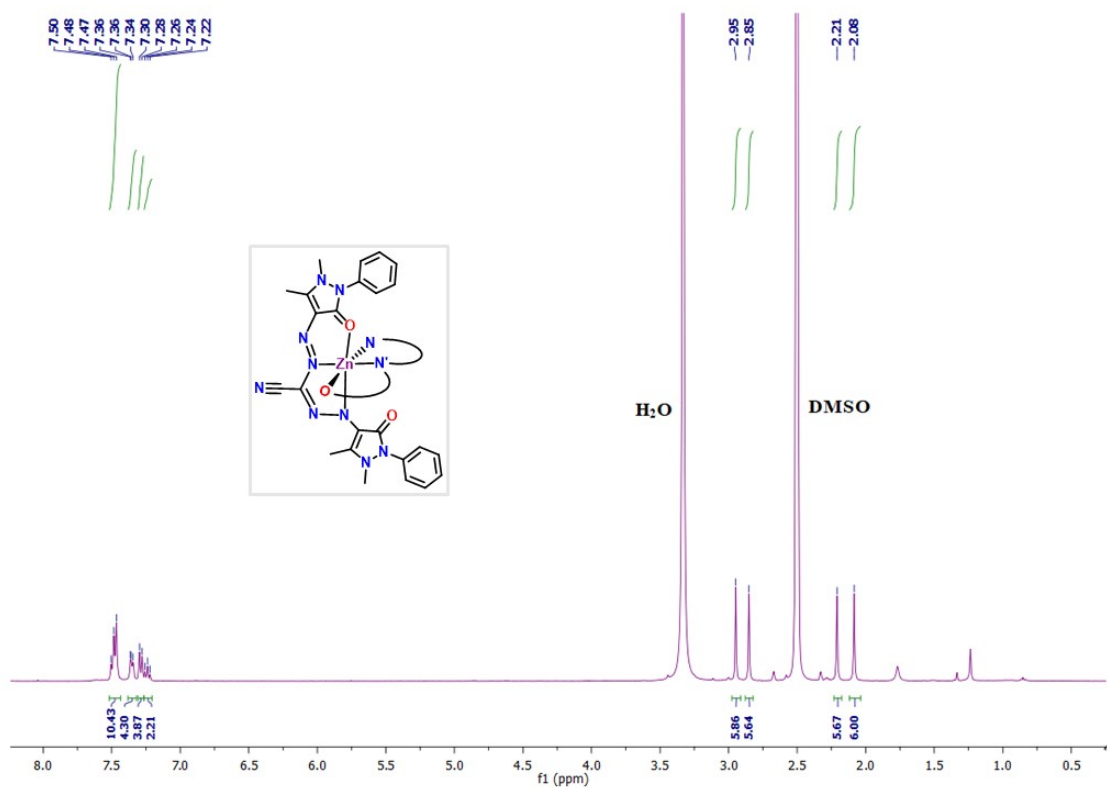

**Figure S6.**  $^1\text{H}$  NMR (400 MHz, DMSO) of Complex 1,  $[\text{Zn}^{\text{II}}\text{L}_2]$ .

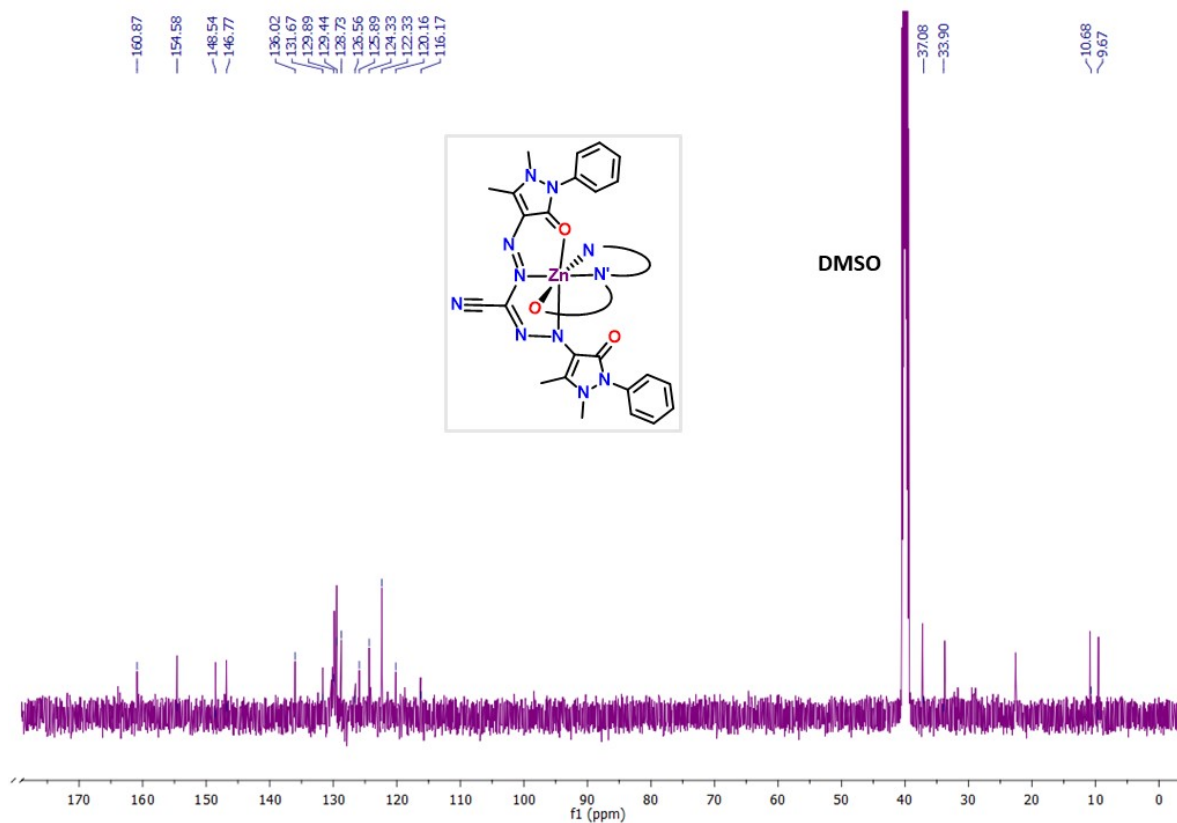

**Figure S7.**  $^{13}\text{C}\{^1\text{H}\}$  (126 MHz, DMSO) NMR of Complex 1,  $[\text{Zn}^{\text{II}}\text{L}_2]$ .

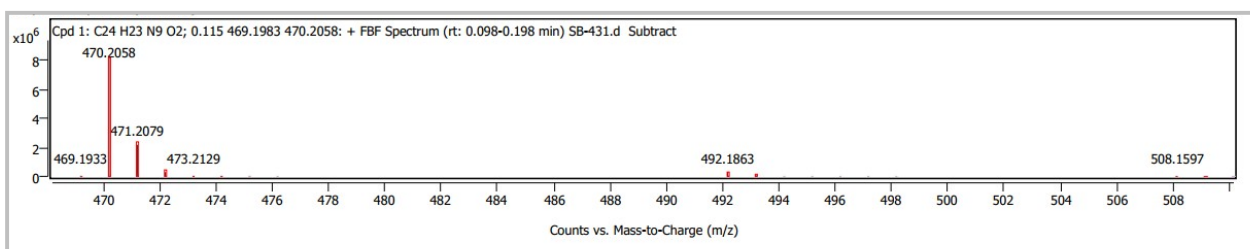

**Figure S8.** ESI-MS analysis for Ligand (LH): Exact mass calcd for  $[\text{C}_{24}\text{H}_{23}\text{N}_9\text{O}_2+\text{H}]^+$ : 470.2008. The exact mass found: 470.2058. Difference: +1.06 ppm.

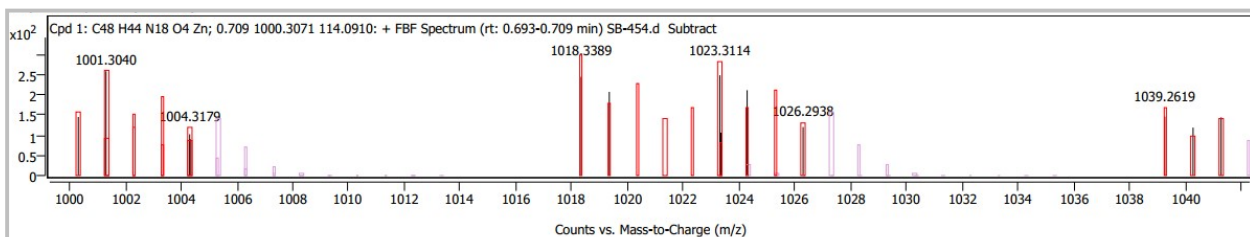

**Figure S9.** ESI-MS analysis for Complex 1,  $[\text{Zn}^{\text{II}}\text{L}_2]$ : Exact mass calcd for  $[\text{C}_{48}\text{H}_{44}\text{N}_{18}\text{O}_4\text{Zn}+\text{H}]^+$ : 1001.3084. The exact mass found: 1001.3040. Difference: -4.39 ppm.

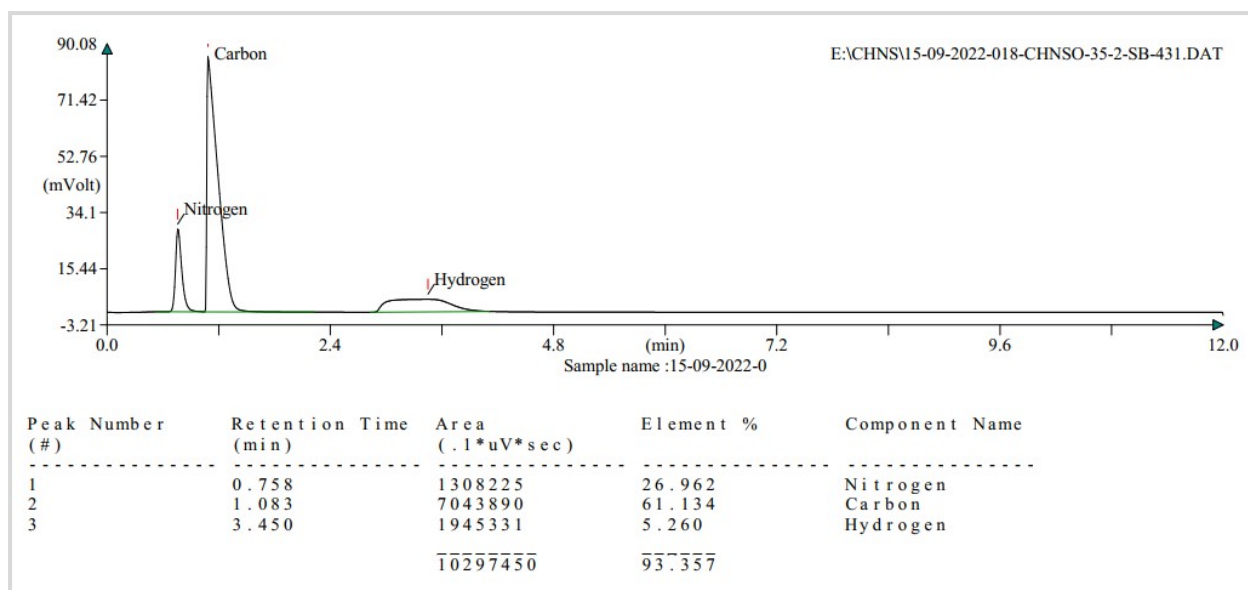

**Figure S10.** Elemental analysis of Ligand (LH): Anal. Calcd. (%) for  $C_{24}H_{23}N_9O_2$ : C, 61.40; H, 4.94; N, 26.85. Found: C, 61.13; H, 5.26; N, 26.96.

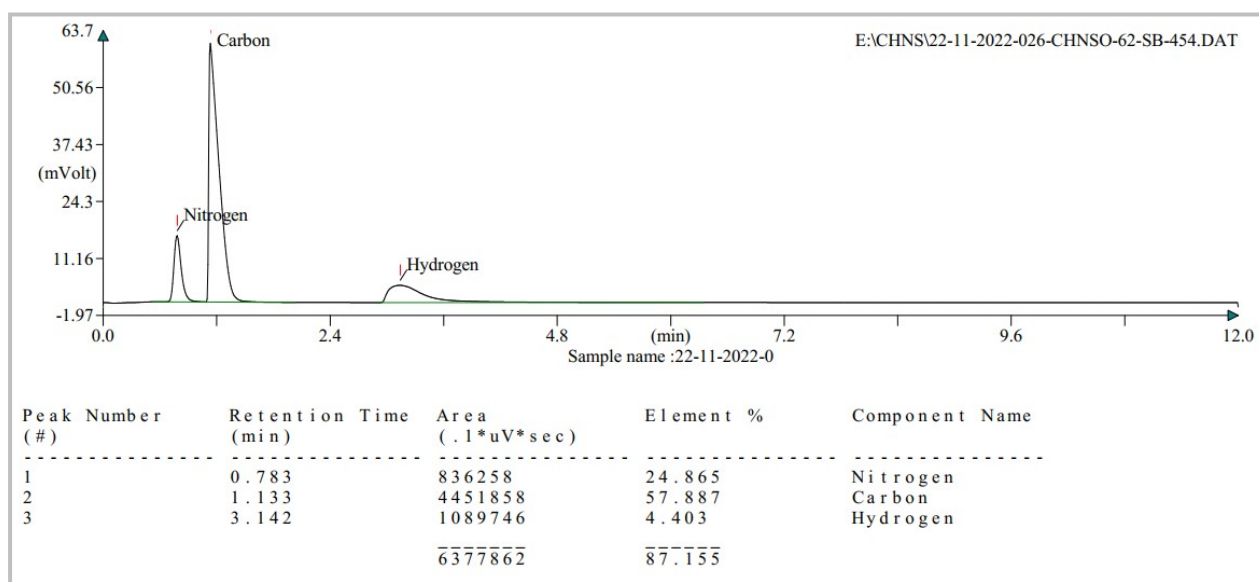

**Figure S11.** Elemental analysis of Complex 1,  $[Zn^{II}L_2]$ : Anal. Calcd. (%) for  $C_{48}H_{44}N_{18}O_4Zn$ : C, 57.52; H, 4.42; N, 25.15. Found: C, 57.88; H, 4.40; N, 24.86.



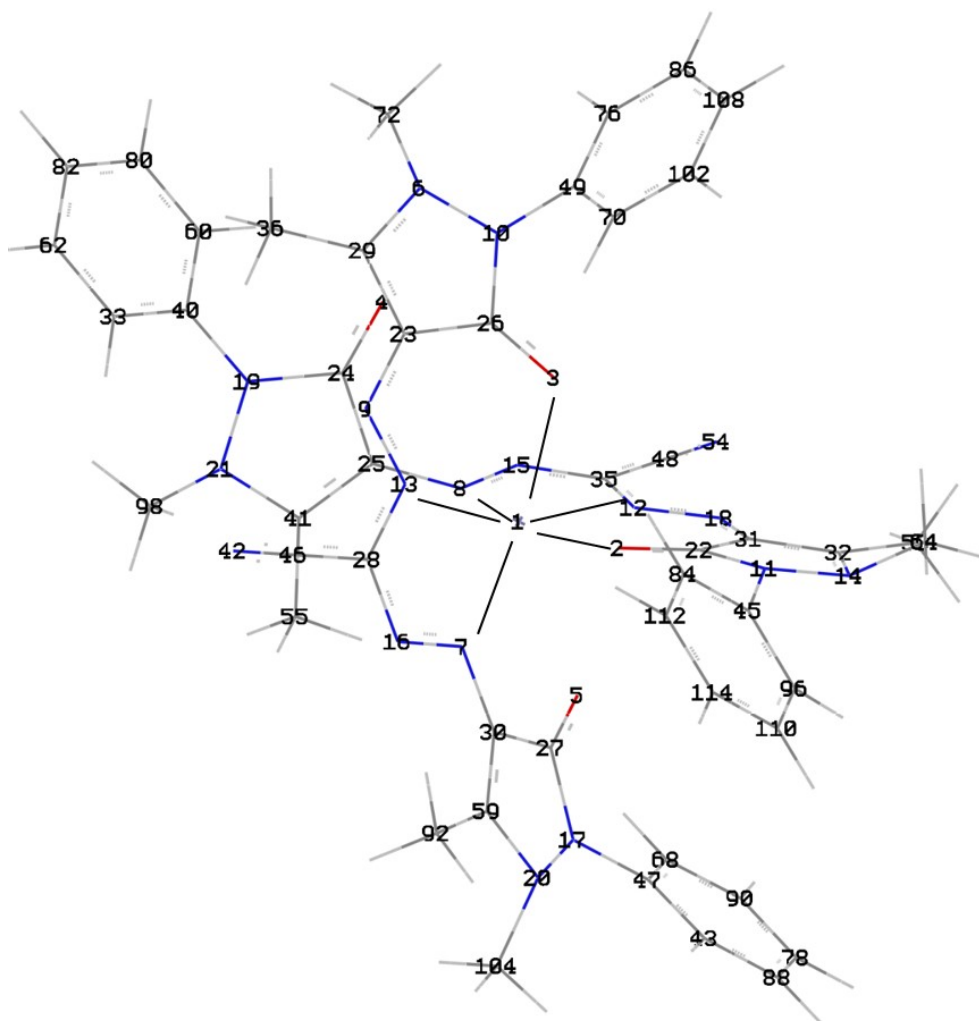

**Figure S12.** DFT optimized structure of complex **1**.

**Table S2.** The Natural Population Analysis (NPA) charges (au) on the metal (Zn) and NNC(CN)NNCCO backbone of coordinating ligand moieties of complex **1**.

| Atom            | NPA Charges (au) |          |
|-----------------|------------------|----------|
|                 | L1               | L2       |
| Zn = 1.55316 au |                  |          |
| N               | -0.41336         | -0.40135 |
| N               | -0.14815         | -0.19676 |
| C               | 0.09465          | 0.09312  |
| C               | 0.23977          | 0.23239  |
| N               | -0.32424         | -0.32099 |
| N               | -0.28135         | -0.32327 |
| N               | -0.20817         | -0.20337 |
| C               | -0.03992         | -0.04877 |
| C               | 0.54189          | 0.54127  |
| O               | -0.65831         | -0.66137 |

**Table S3.** Second-order perturbation energy  $E_2$  (eV), off-diagonal Fock matrix elements  $F(i,j)$  and acceptor – donor energy values ( $E_j - E_i$ ) (a.u.) of selected donor-acceptor NBO-NBO\* interactions in metal-complex, as computed at BP86+D3/TZVPP+SDD method.

| Donor NBO (i)             | Acceptor NBO(j)          | $E_2$ (eV) | $E_j - E_i$ (au) | $F(i,j)$ |
|---------------------------|--------------------------|------------|------------------|----------|
| Ligand-to-Metal           |                          |            |                  |          |
| LP(1)O2                   | LP*(1)Zn                 | 0.51       | 0.53             | 0.071    |
| LP(2)O2                   | LP*(1)Zn                 | 0.62       | 0.27             | 0.055    |
| LP(1)N8                   | LP*(1)Zn                 | 1.57       | 0.34             | 0.100    |
| LP(1)N12                  | LP*(1)Zn                 | 1.26       | 0.34             | 0.090    |
| Ligand-to-Ligand (within) |                          |            |                  |          |
| LP(2)O4                   | $\pi^*(\text{C60-C80})$  | 0.02       | 0.19             | 0.009    |
| LP(1)N8                   | $\pi^*(\text{N8-N15})$   | 0.03       | 0.27             | 0.012    |
| LP(1)N8                   | $\pi^*(\text{C25-C41})$  | 0.21       | 0.33             | 0.036    |
| LP(1)N11                  | $\pi^*(\text{O2-C22})$   | 1.77       | 0.23             | 0.086    |
| LP(1)N11                  | $\pi^*(\text{C45-C96})$  | 0.69       | 0.24             | 0.056    |
| LP(1)N14                  | $\pi^*(\text{C31-C32})$  | 0.97       | 0.27             | 0.07     |
| LP(1)N15                  | $\pi^*(\text{C25-C41})$  | 0.03       | 0.28             | 0.012    |
| LP(1)N18                  | $\pi^*(\text{C48-N54})$  | 0.05       | 0.37             | 0.019    |
| LP(1)N19                  | $\pi^*(\text{O4-C24})$   | 1.51       | 0.24             | 0.081    |
| LP(1)N19                  | $\pi^*(\text{C33-C40})$  | 0.81       | 0.23             | 0.059    |
| LP(1)N21                  | $\pi^*(\text{C25-C41})$  | 0.86       | 0.28             | 0.067    |
| LP(1)C35                  | $\pi^*(\text{N8-N15})$   | 7.45       | 0.06             | 0.093    |
| LP(1)C35                  | $\pi^*(\text{N12-N18})$  | 6.74       | 0.05             | 0.083    |
| LP(1)C35                  | $\pi^*(\text{C48-N54})$  | 2.67       | 0.2              | 0.098    |
| $\pi(\text{O2-C22})$      | $\pi^*(\text{O2-C22})$   | 0.09       | 0.3              | 0.022    |
| $\pi(\text{O2-C22})$      | $\pi^*(\text{C31-C32})$  | 0.15       | 0.32             | 0.029    |
| $\pi(\text{O4-C24})$      | $\pi^*(\text{O4-C24})$   | 0.08       | 0.3              | 0.022    |
| $\pi(\text{O4-C24})$      | $\pi^*(\text{C25-C41})$  | 0.16       | 0.31             | 0.03     |
| $\pi(\text{N8-N15})$      | $\pi^*(\text{N8-N15})$   | 0.07       | 0.25             | 0.019    |
| $\pi(\text{N8-N15})$      | $\pi^*(\text{C25-C41})$  | 0.28       | 0.31             | 0.04     |
| $\pi(\text{N12-N18})$     | $\pi^*(\text{C31-C32})$  | 0.57       | 0.3              | 0.056    |
| $\pi(\text{C25-C41})$     | $\pi^*(\text{O4-C24})$   | 1.01       | 0.23             | 0.065    |
| $\pi(\text{C25-C41})$     | $\pi^*(\text{N8-N15})$   | 0.31       | 0.19             | 0.033    |
| $\pi(\text{C25-C41})$     | $\pi^*(\text{C25-C41})$  | 0.06       | 0.24             | 0.017    |
| $\pi(\text{C31-C32})$     | $\pi^*(\text{O2-C22})$   | 1.20       | 0.21             | 0.069    |
| $\pi(\text{C31-C32})$     | $\pi^*(\text{N12-N18})$  | 0.91       | 0.19             | 0.056    |
| $\pi(\text{C31-C32})$     | $\pi^*(\text{C31-C32})$  | 0.09       | 0.23             | 0.02     |
| $\pi(\text{C33-C40})$     | $\pi^*(\text{C60-C80})$  | 0.57       | 0.23             | 0.05     |
| $\pi(\text{C33-C40})$     | $\pi^*(\text{C62-C82})$  | 0.65       | 0.23             | 0.053    |
| $\pi(\text{C45-C96})$     | $\pi^*(\text{C84-C112})$ | 0.58       | 0.24             | 0.051    |

|                         |                           |      |      |       |
|-------------------------|---------------------------|------|------|-------|
| $\pi(\text{C45-C96})$   | $\pi^*(\text{C110-C114})$ | 0.62 | 0.24 | 0.052 |
| $\pi(\text{C60-C80})$   | $\pi^*(\text{C33-C40})$   | 0.69 | 0.22 | 0.053 |
| $\pi(\text{C60-C80})$   | $\pi^*(\text{C62-C82})$   | 0.62 | 0.22 | 0.051 |
| $\pi(\text{C62-C82})$   | $\pi^*(\text{C33-C40})$   | 0.63 | 0.22 | 0.051 |
| $\pi(\text{C62-C82})$   | $\pi^*(\text{C60-C80})$   | 0.65 | 0.23 | 0.052 |
| $\pi(\text{C84-C112})$  | $\pi^*(\text{C45-C96})$   | 0.71 | 0.21 | 0.053 |
| $\pi(\text{C84-C112})$  | $\pi^*(\text{C110-C114})$ | 0.63 | 0.22 | 0.051 |
| $\pi(\text{C110-C114})$ | $\pi^*(\text{C45-C96})$   | 0.65 | 0.22 | 0.051 |
| $\pi(\text{C110-C114})$ | $\pi^*(\text{C84-C112})$  | 0.64 | 0.23 | 0.052 |

- **Molecular orbital energy levels Band gap ( $E_g$ ) calculated from UV-visible spectrum**

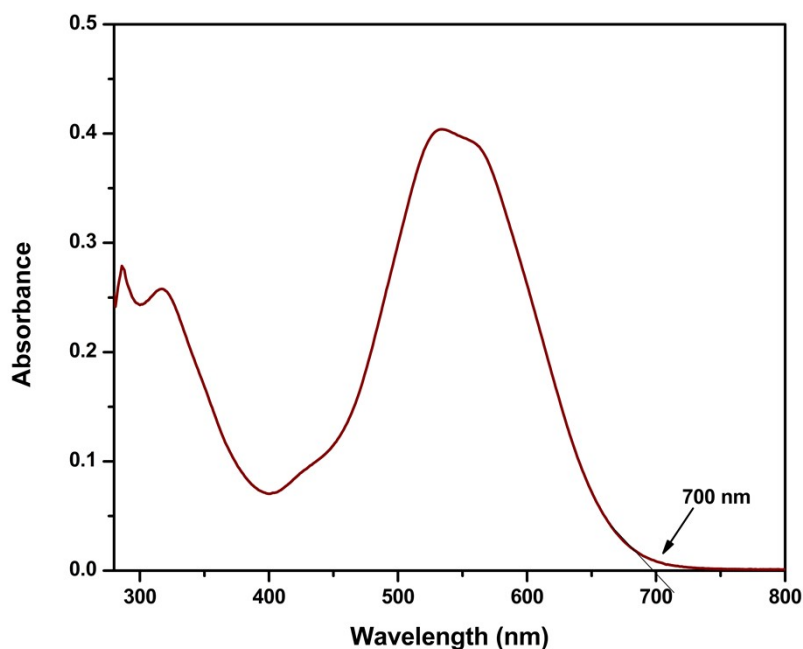

**Figure S13.** UV-vis absorption spectrum for the Complex **1** ( $\text{L}_2\text{Zn}$ ) in  $\text{CHCl}_3$  exhibiting onset optical absorbance.

$$E_g = hc/\lambda_{\text{onset}}$$

where,  $E_g$  is the optical band gap of the complex **1**,  $h$  is the Planck constant ( $6.63 \times 10^{-34} \text{ m}^2\text{kg/s}$ ),  $c$  is the speed of light ( $3 \times 10^8 \text{ m/s}$ ),  $\lambda_{\text{onset}}$  is the onset optical absorbance wavelength.

$$E_g (\text{eV}) = 1240/(\text{wavelength in nm}) = 1240/700 = 1.77 \text{ eV}$$

**Table S4:** Calculated TD-DFT electronic transition wavelength (nm), oscillator strength ( $f_{osc}$ ), major compositions in terms MO contributions and electronic transition character for the ligand (LH) and complex 1 (Zn-L<sub>2</sub>)

| S. no.           | Wavelength (nm) | $f_{osc}$ | Major composition                                           | Transition Character                                         |
|------------------|-----------------|-----------|-------------------------------------------------------------|--------------------------------------------------------------|
| <b>LH</b>        |                 |           |                                                             |                                                              |
| 1.               | 548             | 0.3030    | HOMO+(HOMO-1)+(HOMO-2)+(HOMO-3)                             | $n + \pi \rightarrow \pi^*$                                  |
| 2.               | 468             | 0.8003    | HOMO+(HOMO-1)+(HOMO-2)+(HOMO-3)                             | $n + \pi \rightarrow \pi^*$                                  |
| <b>Complex 1</b> |                 |           |                                                             |                                                              |
| 1.               | 606             | 0.0294    | (HOMO-2) $\rightarrow$ LUMO                                 | $n + \pi \rightarrow \pi^*$<br>inter-ligand                  |
| 2.               | 582             | 0.1642    | (HOMO-1) + (HOMO-2) $\rightarrow$ (LUMO+1)                  | $n + \pi \rightarrow \pi^*$<br>intra-ligand                  |
| 3.               | 562             | 0.4206    | HOMO + (HOMO-3) + (HOMO-5) $\rightarrow$ LUMO               | $n + \pi \rightarrow \pi^*$<br>intra-ligand                  |
| 4.               | 506             | 0.1009    | (HOMO-4) + (HOMO-5) $\rightarrow$ (LUMO+1)                  | $n + \pi \rightarrow \pi^*$<br>inter-ligand,<br>intra-ligand |
| 5.               | 492             | 0.2087    | (HOMO-5) $\rightarrow$ LUMO + (LUMO+1)                      | $n + \pi \rightarrow \pi^*$<br>inter-ligand,<br>intra-ligand |
| 6.               | 475             | 0.5523    | (HOMO-1) + (HOMO-2) $\rightarrow$ (LUMO+1)                  | $\pi \rightarrow \pi^*$<br>intra-ligand                      |
| 9.               | 464             | 0.2422    | (HOMO-6) $\rightarrow$ LUMO + (LUMO+1)                      | $\pi \rightarrow \pi^*$<br>inter-ligand,<br>intra-ligand     |
| 10               | 412             | 0.1468    | HOMO $\rightarrow$ (LUMO+4)<br>(HOMO+10) $\rightarrow$ LUMO | $\pi \rightarrow \pi^*$<br>inter-ligand,<br>intra-ligand     |
